# Supplementary material for: Survived the Glaciations, Will They Survive the Fish? Allochthonous Ichthyofauna and Alpine Endemic Newts: A Road Map for a Conservation Strategy
Source: MDPI journal article supplement (doi:10.3390/ani13050871), 2023-02-27
Supplement: s1 [file s1]

## Supplementary materials

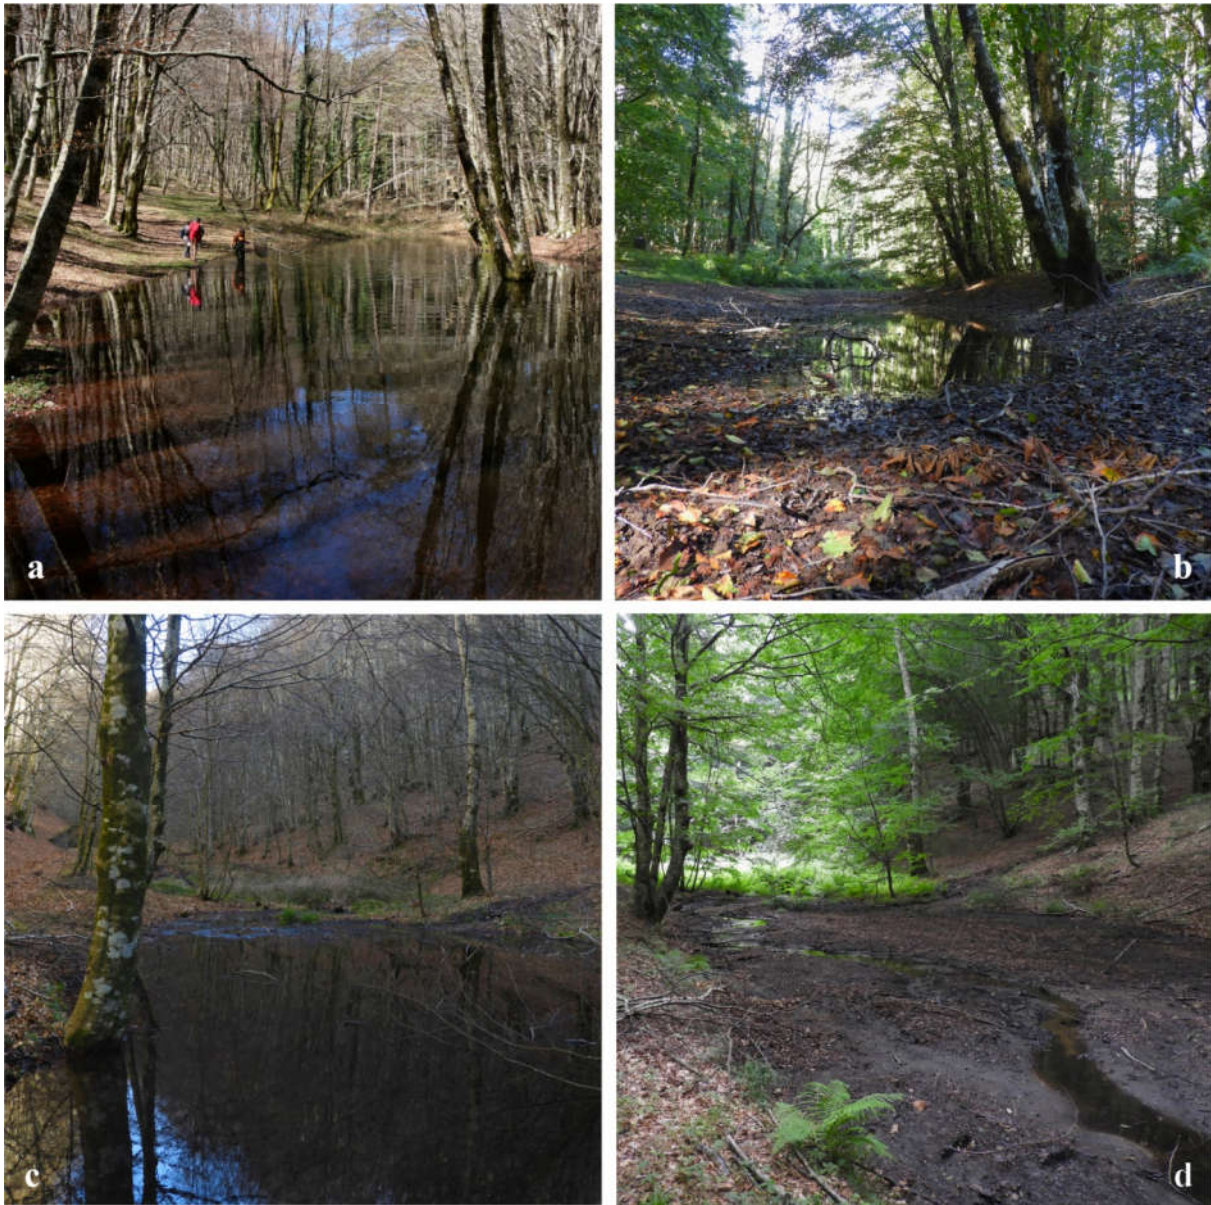

**Figure S1.** Representative images of the new breeding sites of *Ichthyosaura alpestris inexpectata*: Piano di Zanche in April (a) and September (b) 2022; Pantano Lungo in April (c) and July (d) 2022.

**Table S1.** Water physical-chemical parameters measured in the study ponds. Mean ( $\pm$ SD) of electric conductivity = EC, pH, total dissolved solids = TDS, oxygen percentage saturation = O<sub>2</sub> %, dissolved oxygen = DO recorded in (s) summer and (a) autumn is shown.

| Parameter        | Site name         |                   |                   |                   |                   |                    |                   |                   |                   |                   |                   |                   |                   |                   |
|------------------|-------------------|-------------------|-------------------|-------------------|-------------------|--------------------|-------------------|-------------------|-------------------|-------------------|-------------------|-------------------|-------------------|-------------------|
|                  | FO                |                   | DU                |                   | TR                |                    | TRIF              |                   | FA                |                   | PZ                |                   | PL                |                   |
|                  | s                 | a                 | s                 | a                 | s                 | a                  | s                 | a                 | s                 | a                 | s                 | a                 | s                 | a                 |
| T (C°)           | 25.7<br>$\pm$ 0.6 | 13.7<br>$\pm$ 0.2 | 26.1<br>$\pm$ 0.2 | 18.8<br>$\pm$ 0.2 | 24.7<br>$\pm$ 0.6 | 12.8<br>$\pm$ 0.2  | 23.5<br>$\pm$ 0.5 | 12.6<br>$\pm$ 0.2 | 26.1<br>$\pm$ 0.3 | 18.8<br>$\pm$ 0.3 | 19.2<br>$\pm$ 0.4 | 13.2<br>$\pm$ 0.4 | 15.9<br>$\pm$ 0.4 | 12.6<br>$\pm$ 0.4 |
| EC ( $\mu$ S/cm) | 84.3<br>$\pm$ 0.6 | 78.3<br>$\pm$ 1.5 | 58 $\pm$ 1        | 40.3<br>$\pm$ 0.6 | 78.3<br>$\pm$ 0.6 | 72.7<br>$\pm$ 0.6  | 78 $\pm$ 1        | 80.7<br>$\pm$ 0.6 | 81 $\pm$ 2        | 82.5<br>$\pm$ 0.6 | 88.8<br>$\pm$ 0.6 | 85.2<br>$\pm$ 0.3 | 81.7<br>$\pm$ 1.1 | 98.3<br>$\pm$ 0.6 |
| pH               | 6.3 $\pm$ 0.06    | 6.6 $\pm$ 0.05    | 7.2 $\pm$ 0.1     | 6 $\pm$ 0.05      | 6.7 $\pm$ 0.1     | 5.9 $\pm$ 0.02     | 6.8 $\pm$ 0.05    | 6 $\pm$ 0.05      | 6.5 $\pm$ 0.06    | 6.2 $\pm$ 0.1     | 6.1 $\pm$ 0.05    | 6.5 $\pm$ 0.1     | 6.9 $\pm$ 0.05    | 6.6 $\pm$ 0.09    |
| TDS (ppm)        | 43.1<br>$\pm$ 0.5 | 38.8<br>$\pm$ 0.6 | 31.2<br>$\pm$ 0.5 | 25.4<br>$\pm$ 0.4 | 39 $\pm$ 0.5      | 36.3<br>$\pm$ 0.6  | 39.2<br>$\pm$ 1   | 46.3<br>$\pm$ 0.5 | 40 $\pm$ 0.5      | 42 $\pm$ 1        | 45.4<br>$\pm$ 0.4 | 48 $\pm$ 0.6      | 40.2<br>$\pm$ 0.2 | 50.4<br>$\pm$ 0.2 |
| O <sub>2</sub> % | 65 $\pm$ 1        | 72 $\pm$ 1        | 70.1<br>$\pm$ 0.5 | 75 $\pm$ 0.6      | 68 $\pm$ 1        | 78 $\pm$ 0.5       | 65.2<br>$\pm$ 0.2 | 70 $\pm$ 0.7      | 61.2<br>$\pm$ 0.2 | 68 $\pm$ 0.5      | 46 $\pm$ 0.3      | 46 $\pm$ 0.2      | 58.1<br>$\pm$ 1   | 65 $\pm$ 0.5      |
| DO (mg/L)        | 8.8 $\pm$ 0.06    | 9.8 $\pm$ 0.02    | 8.8 $\pm$ 0.01    | 8.7 $\pm$ 0.3     | 7.8 $\pm$ 0.6     | 11.3<br>$\pm$ 0.03 | 5 $\pm$ 0.02      | 8.9 $\pm$ 0.01    | 8.5 $\pm$ 0.05    | 8.9 $\pm$ 0.05    | 5.2 $\pm$ 0.02    | 5.4 $\pm$ 0.01    | 6.8 $\pm$ 0.03    | 6.9 $\pm$ 0.06    |

**Table S2.** Taxonomic list and specimens abundance (number of individuals m<sup>-2</sup>) relative to the total of 43 Families, 15 Orders, and 7 Classes of macroinvertebrates collected in the two sampling campaigns involving the four selected monitoring sites. June = J, October = O, TRIF = Trifoglietti inferiore, PL = Pantano lungo, PZ = Piano di Zanche, FA = Fossa Armando.

| Taxa         |                  |                   | TRIF |      | PL   |      | PZ   |      | FA   |     |
|--------------|------------------|-------------------|------|------|------|------|------|------|------|-----|
| Class        | Order            | Family            | J    | O    | J    | O    | J    | O    | J    | O   |
| Arachnida    | Hydrachnida      | Hydrachnidae      | 11   | -    | -    | -    | 5    | 5    | 16   | 6   |
| Bivalvia     | Eulamellibranchi | Sphaeriidae       | 219  | 475  | 149  | 421  | -    | 133  | 80   | -   |
| Crustacea    | Isopoda          | Asellidae         | 144  | 112  | -    | 80   | -    | -    | 144  | 16  |
| Gordioida    | Gordioidea       | Gordiidae         | -    | -    | 5    | -    | -    | 11   | -    | -   |
| Hirudinea    | Hirudinida       | Haemopidae        | 27   | 11   | -    | -    | -    | -    | 48   | -   |
| Insecta      | Plecoptera       | Capniidae         | -    | -    | 85   | 16   | -    | -    | -    | -   |
|              |                  | Leuctridae        | -    | -    | 112  | 16   | -    | -    | -    | -   |
|              |                  | Nemouridae        | -    | -    | 21   | 21   | -    | -    | -    | -   |
|              | Ephemeroptera    | Baetidae          | 90   | 165  | 37   | -    | -    | -    | 160  | -   |
|              |                  | Heptageniidae     | -    | -    | -    | 11   | -    | -    | -    | -   |
|              | Trichoptera      | Helicopsychidae   | -    | -    | 5    | -    | -    | -    | -    | -   |
|              |                  | Hydropsychidae    | -    | -    | 27   | -    | -    | -    | -    | -   |
|              |                  | Lepidostomatidae  | -    | -    | -    | -    | 37   | 32   | -    | -   |
|              |                  | Limnephilidae     | 27   | 272  | 240  | 133  | 27   | 314  | -    | 139 |
|              |                  | Odontoceridae     | -    | -    | 112  | 75   | 32   | 112  | -    | 85  |
|              |                  | Phryganeidae      | -    | -    | -    | -    | 11   | 11   | 27   | 27  |
|              |                  | Sericostomatidae  | 283  | 192  | 91   | 43   | 373  | 608  | 442  | -   |
|              | Diptera          | Ceratopogonidae   | 37   | -    | 37   | -    | -    | -    | 21   | 16  |
|              |                  | Chironomidae      | 619  | 405  | 715  | 459  | 229  | 53   | 885  | -   |
|              |                  | Culicidae         | -    | -    | -    | -    | 155  | 133  | -    | -   |
|              |                  | Dixidae           | -    | -    | 32   | 5    | -    | -    | -    | -   |
|              |                  | Limoniidae        | -    | -    | 16   | 21   | -    | -    | 5    | -   |
|              |                  | Simuliidae        | -    | -    | 96   | -    | -    | -    | -    | -   |
|              |                  | Tabanidae         | -    | -    | 5    | -    | -    | -    | 5    | 59  |
|              | Odonata          | Aeschnidae        | 43   | 32   | 5    | 27   | -    | -    | -    | -   |
|              |                  | Calopterygidae    | -    | 5    | -    | 5    | 11   | -    | -    | 11  |
|              |                  | Coenagrionidae    | -    | 37   | -    | -    | -    | -    | -    | -   |
|              |                  | Cordulegasteridae | -    | -    | 3    | 21   | -    | -    | -    | -   |
|              |                  | Libellulidae      | 5    | 11   | -    | 5    | -    | -    | -    | 5   |
|              | Coleoptera       | Dryopidae         | 5    | -    | -    | -    | -    | -    | 21   | -   |
|              |                  | Dytiscidae        | -    | 21   | -    | 53   | -    | -    | 48   | 48  |
|              |                  | Elminthidae       | -    | -    | -    | -    | -    | -    | -    | 11  |
|              |                  | Gyrinidae         | 5    | -    | -    | -    | -    | -    | 5    | -   |
|              |                  | Haliplidae        | -    | 11   | 5    | 48   | -    | -    | -    | 11  |
|              |                  | Scirtidae         | -    | -    | 37   | 59   | 283  | 251  | -    | -   |
|              |                  | Hydraenidae       | -    | 11   | -    | -    | 11   | 16   | -    | 11  |
|              |                  | Hydrophilidae     | -    | -    | -    | -    | -    | -    | 5    | -   |
|              | Heteroptera      | Nepidae           | -    | -    | -    | 5    | -    | -    | -    | -   |
|              |                  | Notonectidae      | 5    | -    | -    | 5    | -    | -    | 43   | -   |
|              |                  | Veliidae          | -    | -    | 5    | 5    | -    | -    | -    | -   |
| Oligochaeta  | Opisthopora      | Lumbricidae       | -    | 5    | 21   | 21   | -    | -    | 5    | 5   |
|              | Lumbriculida     | Lumbriculidae     | 11   | 11   | -    | 37   | -    | -    | -    | 229 |
|              | Tubificida       | Naididae          | 27   | 16   | 5    | 16   | -    | -    | 11   | -   |
| <b>Total</b> |                  |                   | 1558 | 1792 | 1866 | 1597 | 1174 | 1679 | 1971 | 743 |

**Table S3.** Morphometric parameters (SVL: Snout vent length; SMI: Scaled mass index) of *Ichthyosaura alpestris inexpectata* from the study sites (TRIF: Trifoglieti inferiore; FA: Fosso Armando; PZ: Piano di Zanche; PL: Pantano Lungo).

| Site | Sex | N  | Body mass (g)   |           | SVL (mm)         |         | Total length (mm) |          | SMI             |             |
|------|-----|----|-----------------|-----------|------------------|---------|-------------------|----------|-----------------|-------------|
|      |     |    | mean $\pm$ SD   | range     | mean $\pm$ SD    | Range   | mean $\pm$ SD     | range    | mean $\pm$ SD   | range       |
| TRIF | M   | 24 | 2.4 $\pm$ 0.49  | 1.6 - 3.3 | 47 $\pm$ 4.13    | 40 – 57 | 81.29 $\pm$ 5.4   | 71 - 90  | 2.41 $\pm$ 0.44 | 1.46 - 3    |
|      | F   | 18 | 4.14 $\pm$ 0.94 | 2.5 - 5.7 | 53.5 $\pm$ 3.20  | 48 – 60 | 93.5 $\pm$ 5.43   | 85 - 103 | 4.14 $\pm$ 0.76 | 2.41 – 5.45 |
| FA   | M   | 11 | 2.66 $\pm$ 0.32 | 2.1 - 3.1 | 45.94 $\pm$ 2.93 | 43 – 51 | 77.91 $\pm$ 3.96  | 73 - 86  | 2.72 $\pm$ 0.35 | 2.07 – 3.35 |
|      | F   | 4  | 4.57 $\pm$ 0.74 | 3.9 - 5.4 | 54.5 $\pm$ 3.32  | 50 – 57 | 93 $\pm$ 5.48     | 85 - 97  | 4.6 $\pm$ 0.77  | 3.47 – 5.12 |
| PZ   | M   | 5  | 3.54 $\pm$ 0.24 | 3.2 - 3.8 | 48.8 $\pm$ 1.09  | 48 – 50 | 83.8 $\pm$ 2.17   | 80 - 85  | 3.54 $\pm$ 0.16 | 3.37 – 3.79 |
|      | F   | 4  | 4.87 $\pm$ 1.22 | 3.8 - 6.5 | 53.25 $\pm$ 2.75 | 50 – 56 | 94.25 $\pm$ 6.75  | 87 - 100 | 4.85 $\pm$ 0.67 | 4.04 – 5.59 |
| PL   | M   | 16 | 2.71 $\pm$ 0.41 | 2.2 - 3.6 | 47.19 $\pm$ 3.54 | 40 – 54 | 81.06 $\pm$ 6.27  | 70 - 93  | 2.71 $\pm$ 0.34 | 2.3 – 3.35  |
|      | F   | 42 | 4.42 $\pm$ 1.24 | 2.2 - 7   | 52.74 $\pm$ 4.82 | 40 – 60 | 95.55 $\pm$ 5.68  | 85 - 105 | 4.35 $\pm$ 0.73 | 3.17 – 6.19 |
